# Supplementary material
Source: PubMed Central journal article supplement (PMC7793009)
Supplement: NIHMS1653317-supplement-Supplementary_Information.pdf [file NIHMS1653317-supplement-Supplementary_Information.pdf]

## Supporting Information

### Small molecule compounds that inhibit antioxidant response gene expression in an inducer-dependent manner

Megan R. Edwards<sup>1</sup>, Gai Liu<sup>2</sup>, Sampriti De<sup>1</sup>, Julien Sourimant<sup>3</sup>, Colette Pietzsch<sup>4</sup>, Britney Johnson<sup>5</sup>, Gaya K. Amarasinghe<sup>5</sup>, Daisy W. Leung<sup>6</sup>, Alexander Bukreyev<sup>5,7</sup>, Richard K. Plemper<sup>3</sup>, Zachary Aron<sup>2</sup>, Terry L. Bowlin<sup>2</sup>, Donald T. Moir<sup>2</sup>, Christopher F. Basler<sup>1\*</sup>

<sup>1</sup> Center for Microbial Pathogenesis, Institute for Biomedical Sciences, Georgia State University, Atlanta, GA 30303, USA

<sup>2</sup> Microbiotix Inc, 1 Innovation Drive, Worcester MA 01605, United States

<sup>3</sup> Institute for Biomedical Sciences, Georgia State University, Atlanta, GA 30303, USA

<sup>4</sup> Department of Pathology, Galveston National Laboratory, University of Texas Medical Branch at Galveston, Galveston, TX 77555, United States

<sup>5</sup> Department of Pathology and Immunology, Washington University School of Medicine, St Louis, MO 63110, United States

<sup>6</sup> Department of Internal Medicine, Washington University School of Medicine, St Louis, MO 63110, United States

<sup>7</sup> Department of Microbiology and Immunology, Galveston National Laboratory, University of Texas Medical Branch at Galveston, Galveston, TX 77555, United States

\* Corresponding author

#### Table of contents:

|                |    |
|----------------|----|
| Figure S1..... | S2 |
| Figure S2..... | S3 |
| Figure S3..... | S4 |
| Figure S4..... | S5 |

The supporting information contains five pages comprised of four figures.

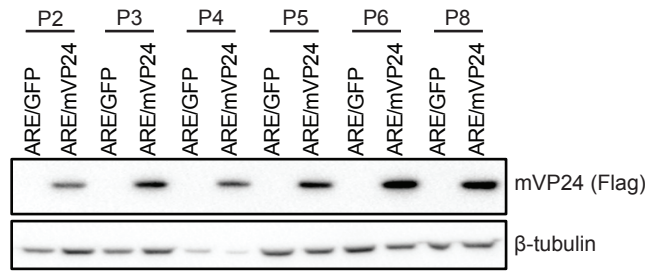

**Figure S1 (related to Figure 1).** Analysis of cell lysates from ARE/GFP and ARE/mVP24 HEK-293T cells at indicated passages (P) for Flag-mVP24 expression. Western blots were performed with anti-Flag antibody.

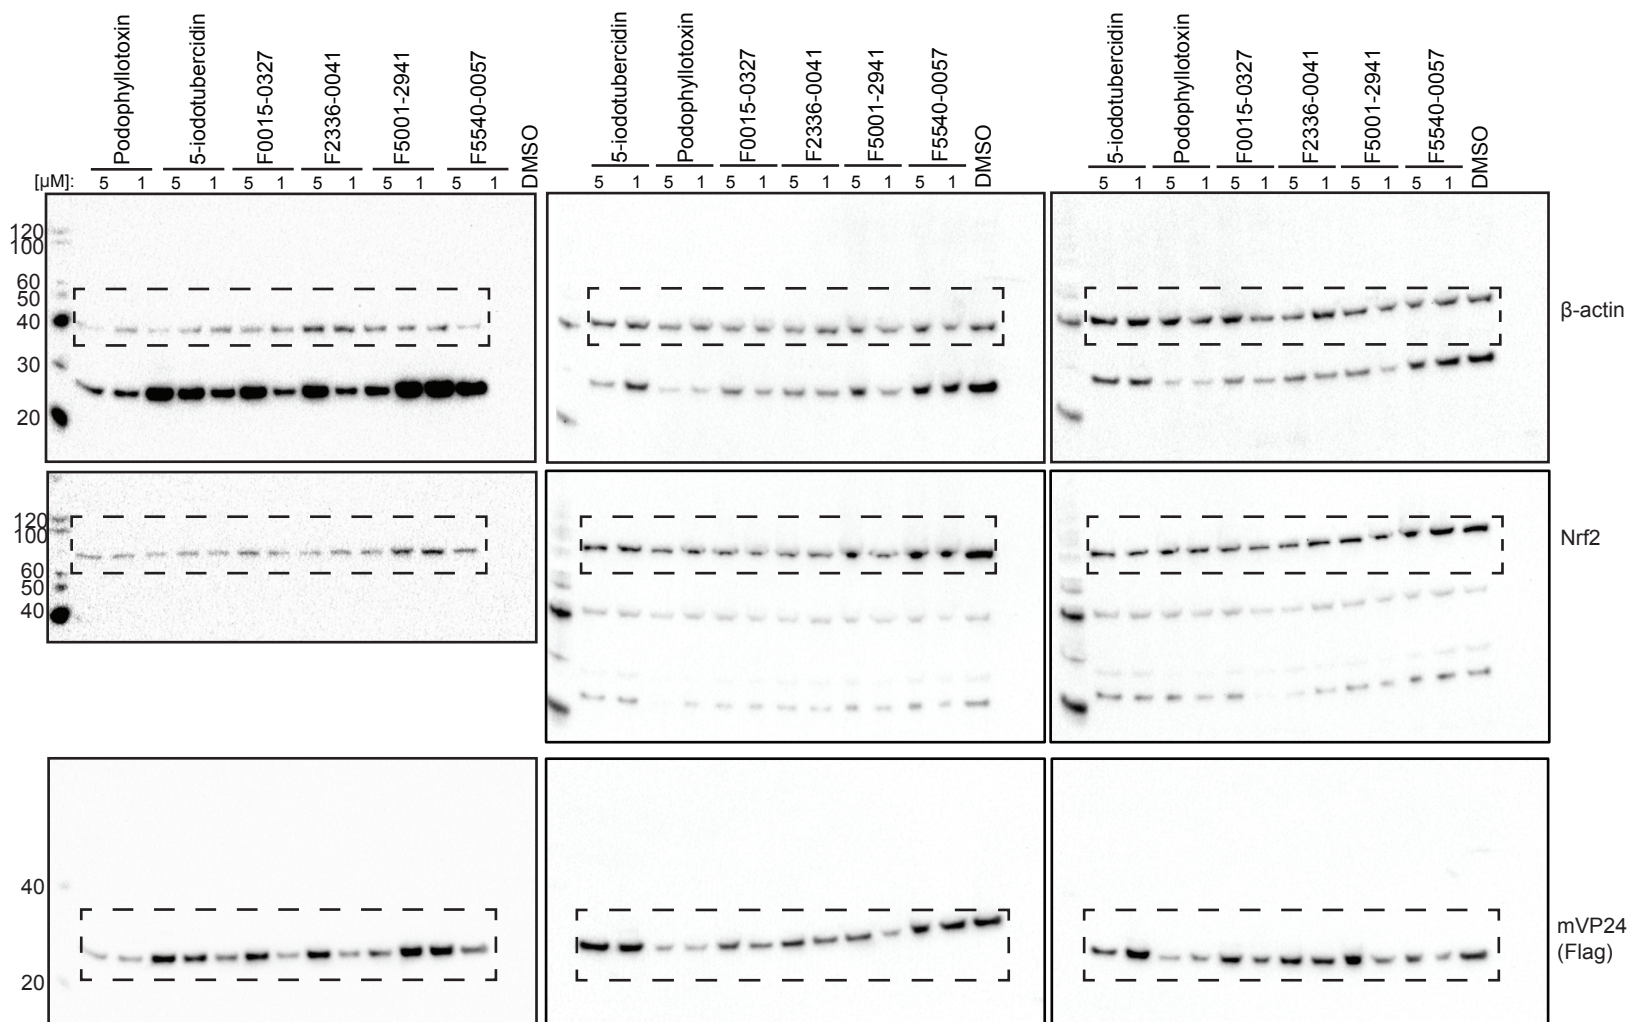

**Figure S2 (related to Figure 4).** Western blots used for the analysis of relative expression of Flag-tagged mVP24, Nrf2 and  $\beta$ -actin in ARE/mVP24 HEK293T cells treated with the indicated compounds at 5 and 1  $\mu$ M for 24 h. Western blots were probed with individual antibodies sequentially; anti-Flag first, followed by anti- $\beta$ -actin, and anti-Nrf2 last. Dashed boxes indicate the bands used in the analysis. The order of the podophyllotoxin and 5-iodotubercidin samples are different in the left-most image, compared with the center and right images.

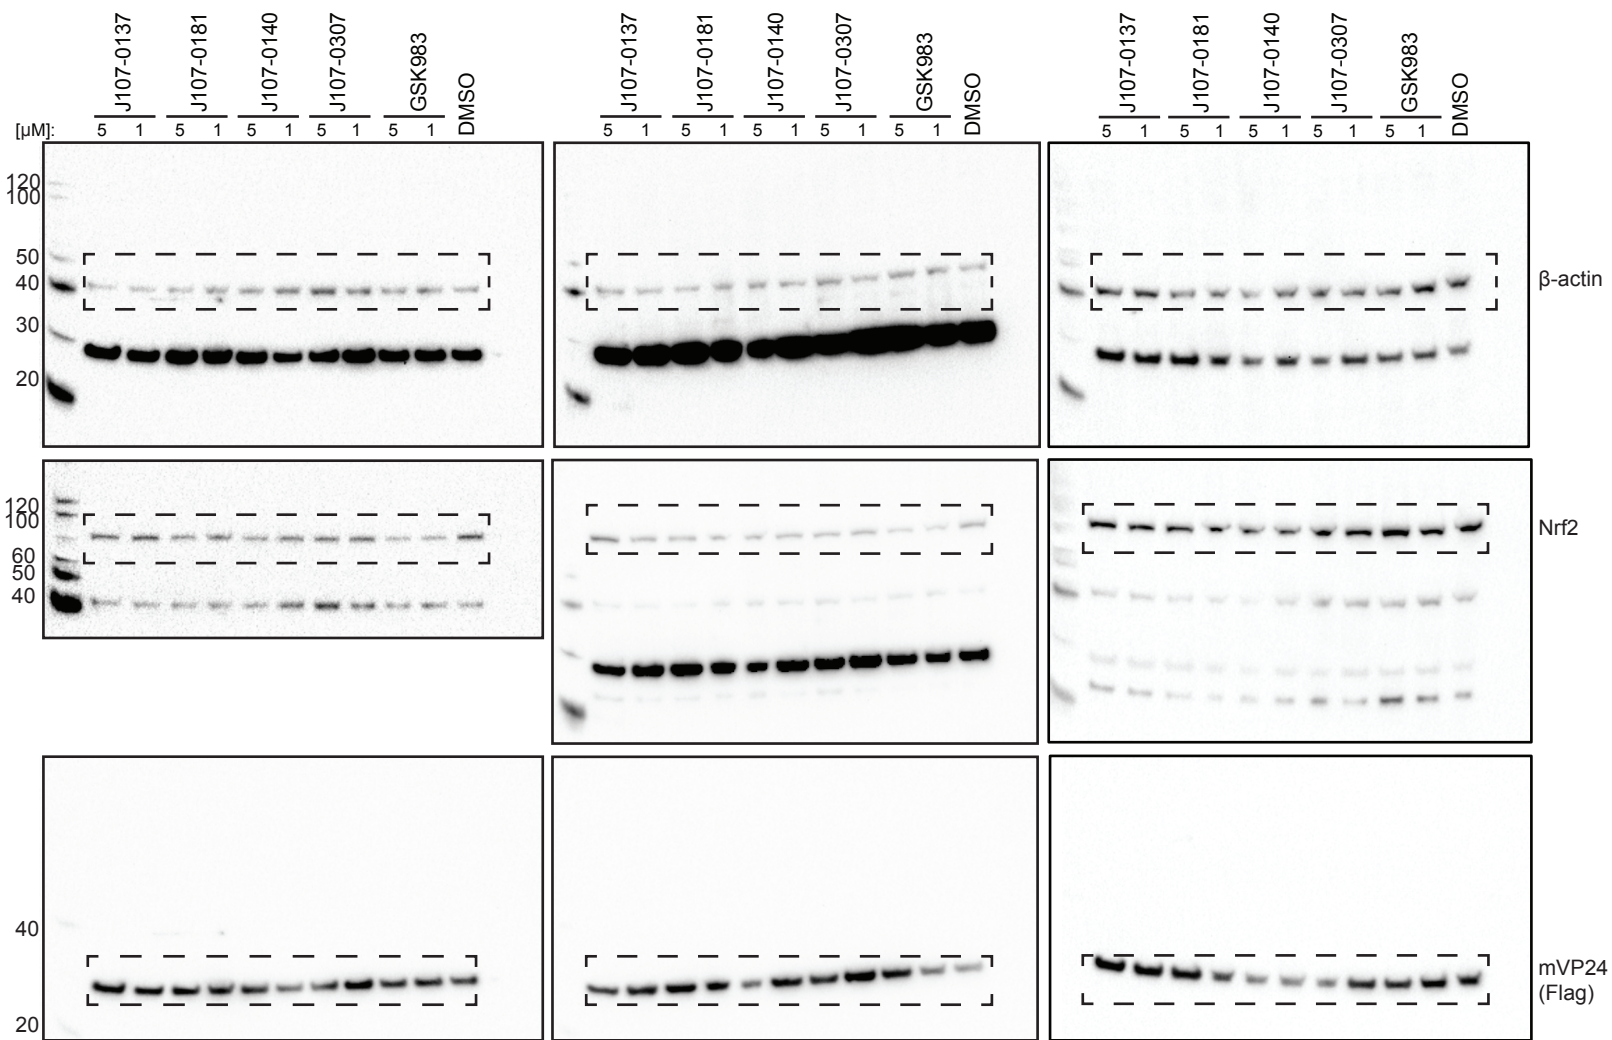

**Figure S3 (related to Figure 5).** Western blots used for the analysis of relative expression of Flag tagged mVP24, Nrf2 and  $\beta$ -actin in ARE/mVP24 HEK293T cells treated with the indicated compounds at 5 and 1  $\mu$ M for 24 h. Western blots were probed with individual antibodies sequentially; anti-Flag first, followed by anti- $\beta$ -actin, and anti-Nrf2 last. Dashed boxes indicate the bands used in the analysis.



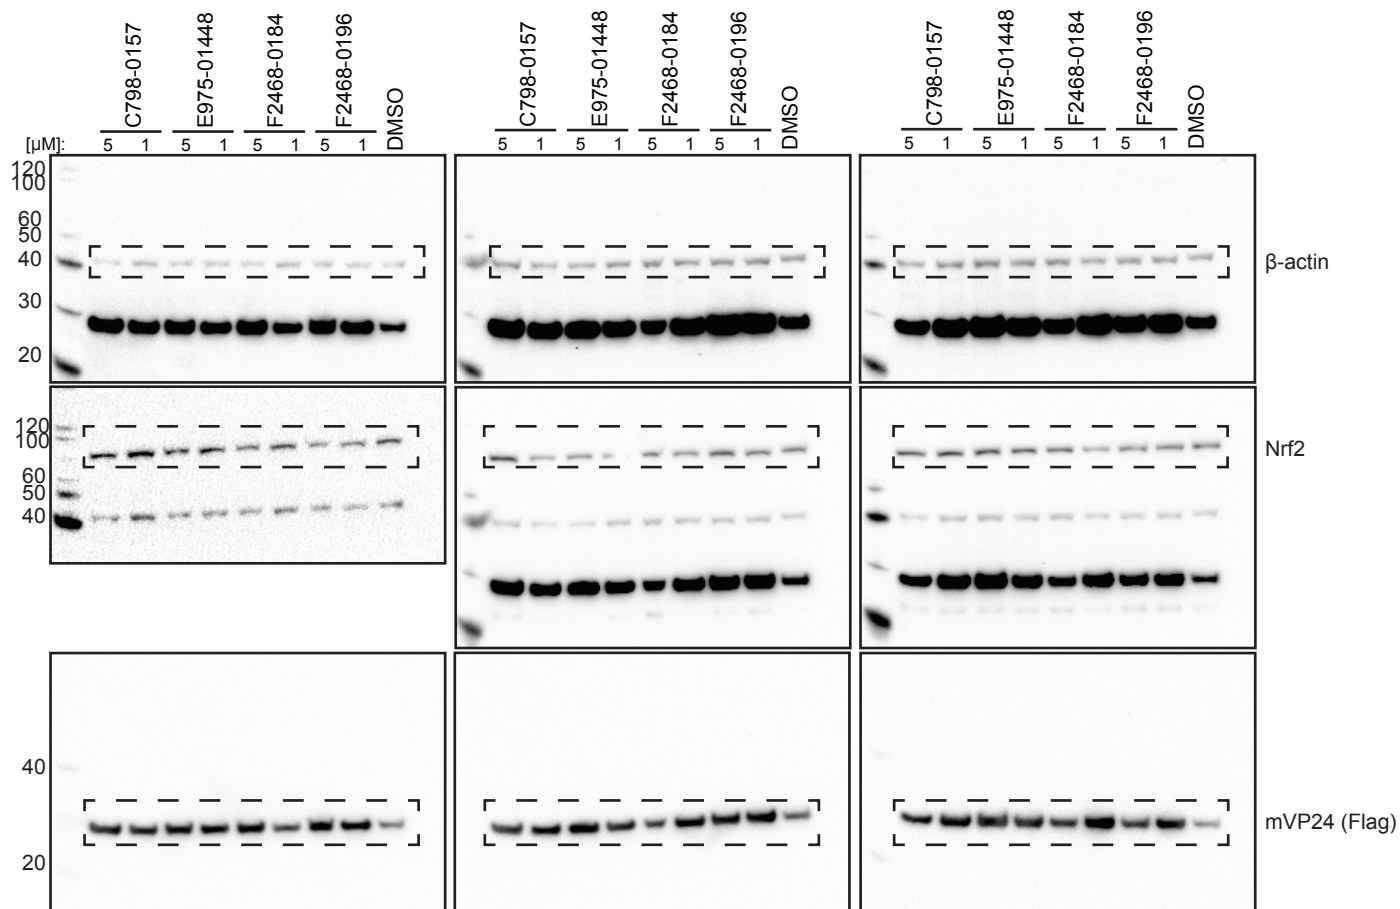

**Figure S4 (related to Figure 6).** Western blots used for the analysis of relative expression of Flag tagged mVP24, Nrf2 and  $\beta$ -actin in ARE/mVP24 HEK293T cells treated with the indicated compounds at 5 and 1  $\mu$ M for 24 h. Western blots were probed with individual antibodies sequentially; anti-Flag first, followed by anti- $\beta$ -actin, and anti-Nrf2 last. Dashed boxes indicate the bands used in the analysis.
